# Supplementary material for: Catalytic deoxygenation of C18 fatty acid over supported metal Ni catalysts promoted by the basic sites of ZnAl2O4 spinel phase
Source: Royal Society of Chemistry journal article supplement (doi:10.1039/c8cy02027b), 2018-11-23
Supplement: c8cy02027b1.pdf [file c8cy02027b1.pdf]

# Catalytic deoxygenation of C<sub>18</sub> fatty acid over supported metal Ni catalyst promoted by the basic sites of ZnAl<sub>2</sub>O<sub>4</sub> spinel phase

Guangci Li,<sup>\*,a</sup> Lei Chen,<sup>a</sup> Ruikun Fan,<sup>a</sup> Di Liu,<sup>b</sup> Song Chen,<sup>a</sup> Xuebing Li,<sup>\*,a</sup> and Keng

H. Chung<sup>a</sup>

<sup>a</sup> *Key Laboratory of Biofuels, Qingdao Institute of Bioenergy and Bioprocess Technology,*

*Chinese Academy of Sciences, Qingdao, 266101, PR China*

<sup>b</sup> *College of Chemical and Environmental Engineering, Shandong University of Science and*

*Technology, Qingdao 266590, P.R. China.*

---

\* Corresponding authors.

E-mail addresses: [ligc@qibebt.ac.cn](mailto:ligc@qibebt.ac.cn) (G. Li), [lixb@qibebt.ac.cn](mailto:lixb@qibebt.ac.cn) (X. Li).

## Experimental section

All chemicals were purchased from commercial suppliers and used as received without further purification:  $\text{Ni}(\text{NO}_3)_2 \cdot 6\text{H}_2\text{O}$ ,  $\text{Zn}(\text{NO}_3)_2 \cdot 6\text{H}_2\text{O}$ ,  $\text{Al}(\text{NO}_3)_3 \cdot 9\text{H}_2\text{O}$ , urea,  $\text{SiO}_2$ , and decalin (Sinopharm, AR standard), oleic acid, stearic acid, and 1-octadecanol (Aladdin, AR standard), *n*-octadecane (Aladdin,  $\geq 99.5\%$  GC standard).

### *Preparation of $\text{ZnAl}_2\text{O}_4$ support*

$\text{ZnAl}_2\text{O}_4$  support was prepared via a hydrothermal synthesis process followed by a thermal treatment. Typically,  $\text{Zn}(\text{NO}_3)_2 \cdot 6\text{H}_2\text{O}$  (2 mmol),  $\text{Al}(\text{NO}_3)_3 \cdot 9\text{H}_2\text{O}$  (4 mmol), and urea (48 mmol) were dissolved into deionized water (40 mL) to form a colorless solution. The solution was then transferred into 100 mL Teflon-lined stainless autoclave and heated at 180 °C for 3 h to produce Zn-Al oxide precursor. After that, the autoclave was cooled naturally to room temperature, and the white precursor was collected by filtration, washed with deionized water to get a neutral pH, and then dried in air at 80 °C overnight. The dried material was then calcined at 750 °C for 4 h to produce the final composite oxide.

### *Preparation of $\text{Ni}/\text{ZnAl}_2\text{O}_4$ and $\text{Ni}/\text{SiO}_2$*

The preparation procedure for the two Ni-based catalysts is the same as described in Section 2.2 in the text.

Table S1. Textural properties of the Zn-Al composite oxides.

| Catalyst | BET specific surface area<br>(m <sup>2</sup> /g) | Pore volume<br>(cm <sup>3</sup> /g) | Average pore diameter<br>(nm) |
|----------|--------------------------------------------------|-------------------------------------|-------------------------------|
| S-120    | 87.8                                             | 0.17                                | 3.9                           |
| S-140    | 86.1                                             | 0.22                                | 5.1                           |
| S-160    | 104.2                                            | 0.20                                | 3.8                           |
| S-180    | 76.5                                             | 0.19                                | 5.0                           |
| S-200    | 77.1                                             | 0.20                                | 5.1                           |

Table S2. XPS data for Zn 2p<sub>3/2</sub> spectra of different Ni-based catalysts.

| Catalysts | ZnAl <sub>2</sub> O <sub>4</sub> |         | ZnO     |         |
|-----------|----------------------------------|---------|---------|---------|
|           | BE (eV)                          | At. (%) | BE (eV) | At. (%) |
| C-120     | 1021.6                           | 46.8    | 1021.2  | 53.2    |
| C-140     | 1021.9                           | 50.0    | 1021.3  | 50.0    |
| C-160     | 1022.2                           | 55.1    | 1021.5  | 44.9    |
| C-180     | 1022.7                           | 58.9    | 1021.7  | 41.1    |
| C-200     | 1022.7                           | 64.8    | 1021.6  | 35.2    |

Table S3. The Ni content of different Ni-based catalysts and Ni species distribution.

| Catalysts | Ni content<br>(wt.%) [a] | Surface Ni content<br>(wt.%) [b] | Ni <sup>2+</sup> |         | Ni <sup>0</sup> |         |
|-----------|--------------------------|----------------------------------|------------------|---------|-----------------|---------|
|           |                          |                                  | BE (eV)          | At. (%) | BE (eV)         | At. (%) |
| C-120     | 10.8                     | 9.2                              | 855.3            | 92.1    | 851.9           | 7.9     |
| C-140     | 11.0                     | 9.2                              | 855.6            | 86.1    | 852.1           | 13.9    |
| C-160     | 10.5                     | 13.5                             | 855.7            | 82.2    | 852.5           | 17.8    |
| C-180     | 10.6                     | 18.0                             | 856.2            | 78.1    | 853.5           | 21.9    |
| C-200     | 10.3                     | 19.6                             | 856.2            | 75.0    | 853.1           | 25.0    |

[a] The value is determined by ICP-OES analysis.

[b] The value is determined by XPS analysis.

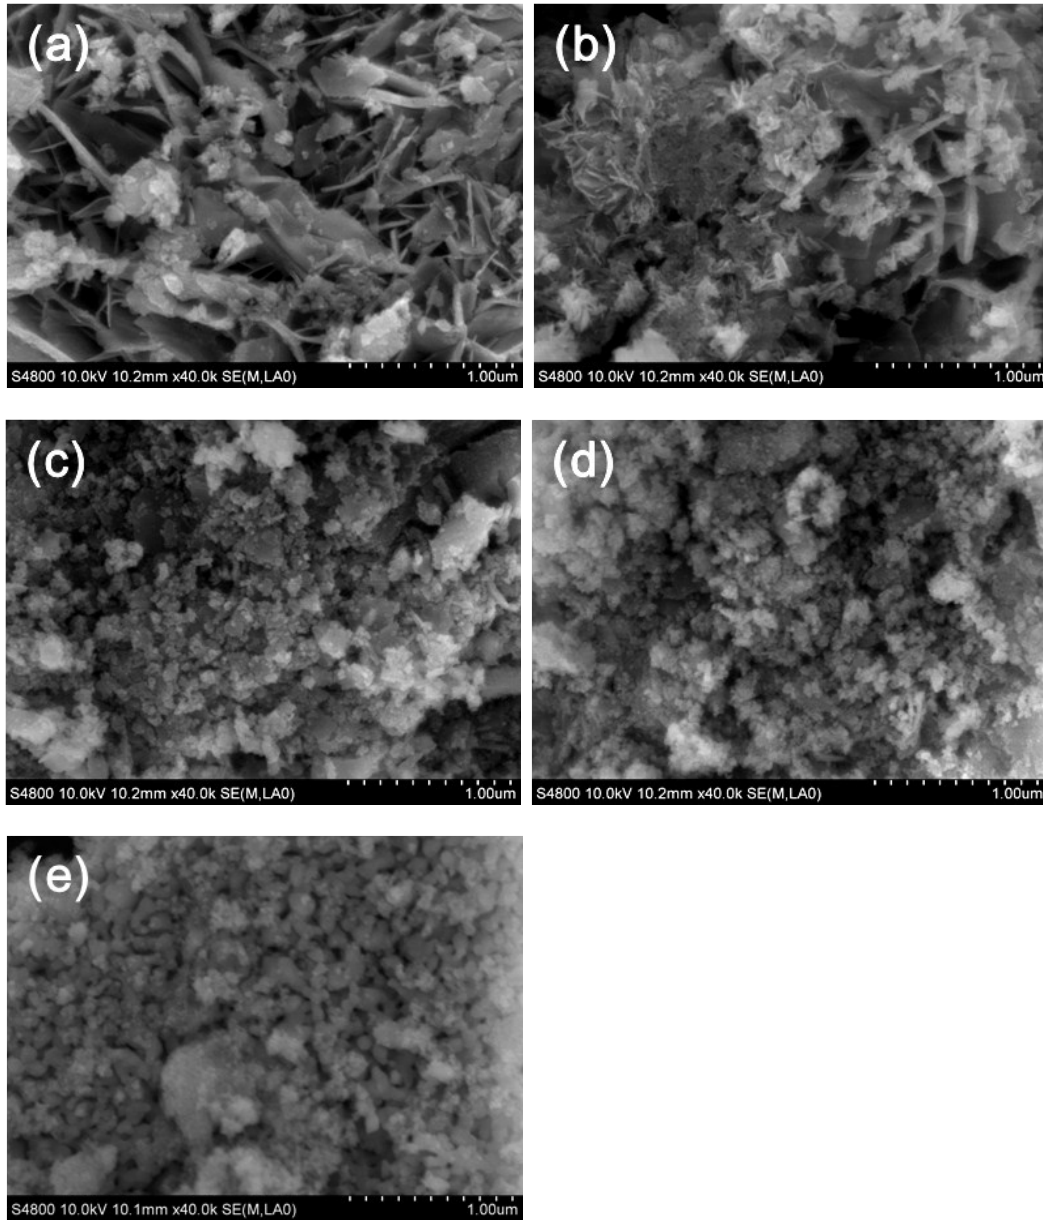

Fig. S1. SEM images of Zn-Al composite oxides: (a) S-120, (b) S-140, (c) S-160, (d) S-180, and (e) S-200.

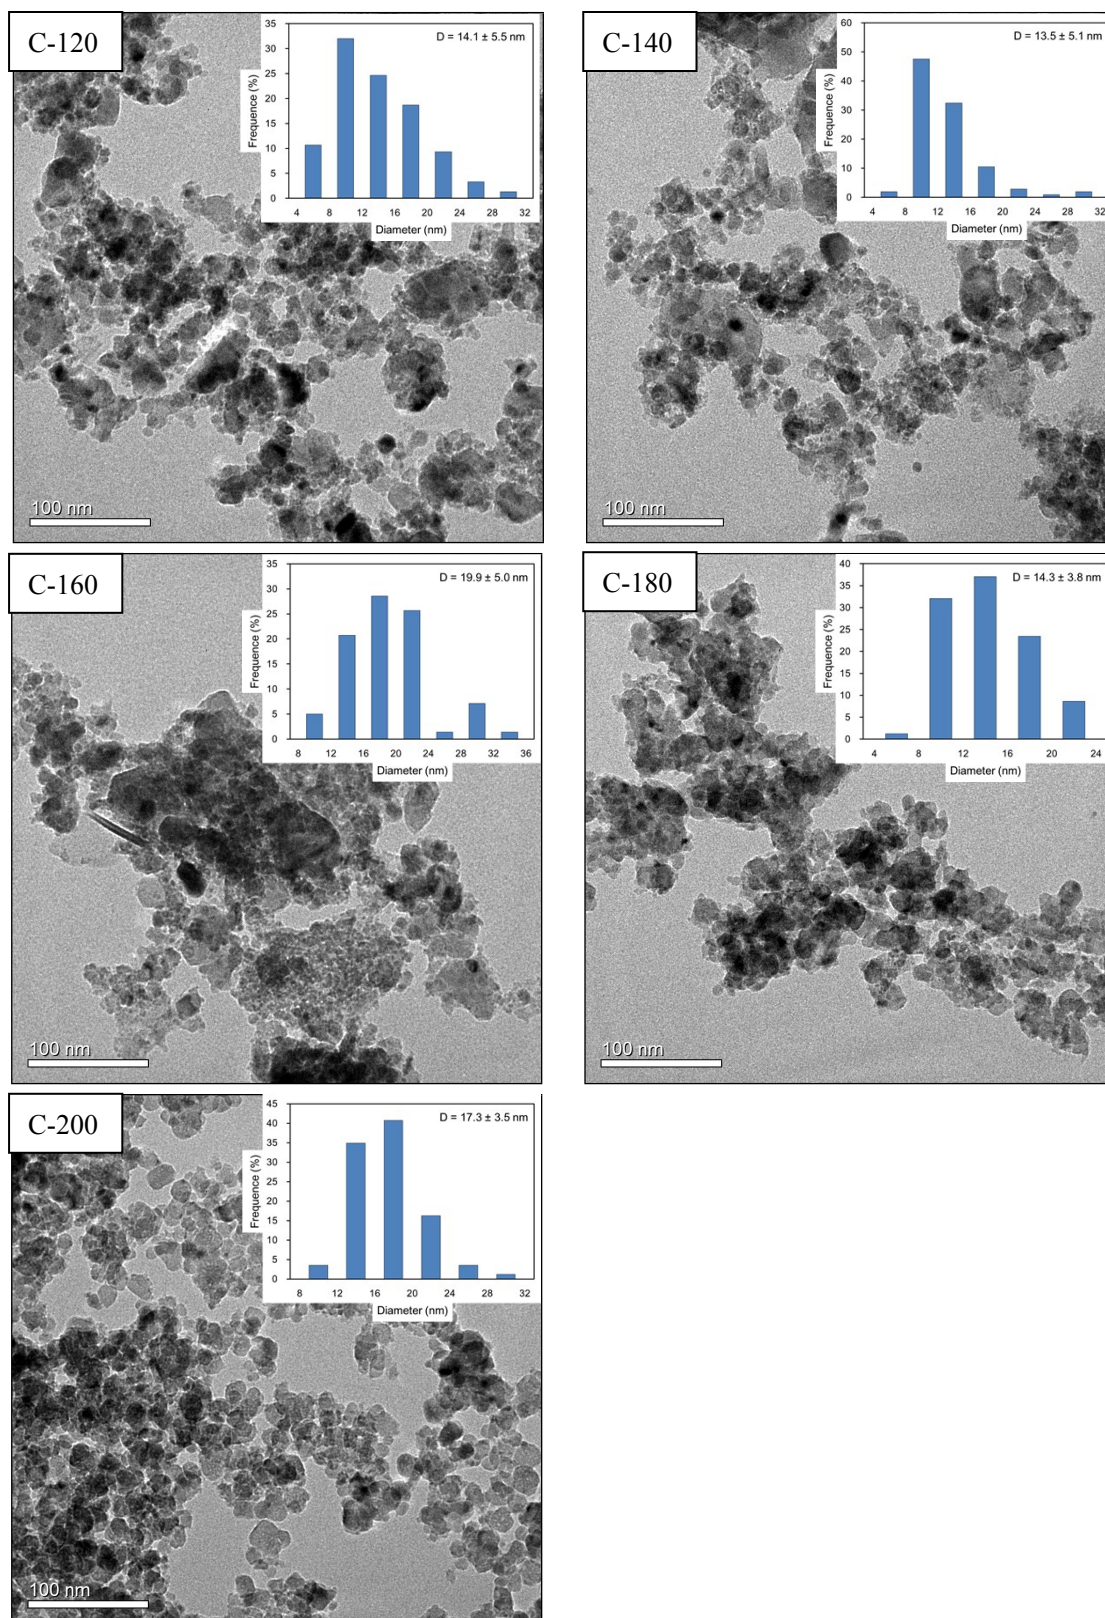

Fig. S2. TEM images of the reduced Ni-based catalysts and their histograms of Ni particle size distribution (inset).

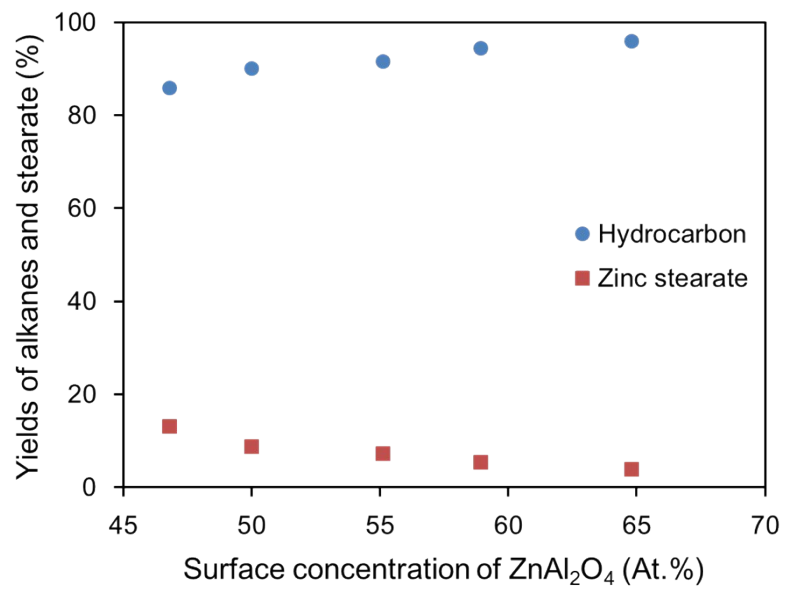

Fig. S3. Yields of heptadecane and zinc stearate as a function of surface concentration of ZnAl<sub>2</sub>O<sub>4</sub> on Ni-based catalysts.



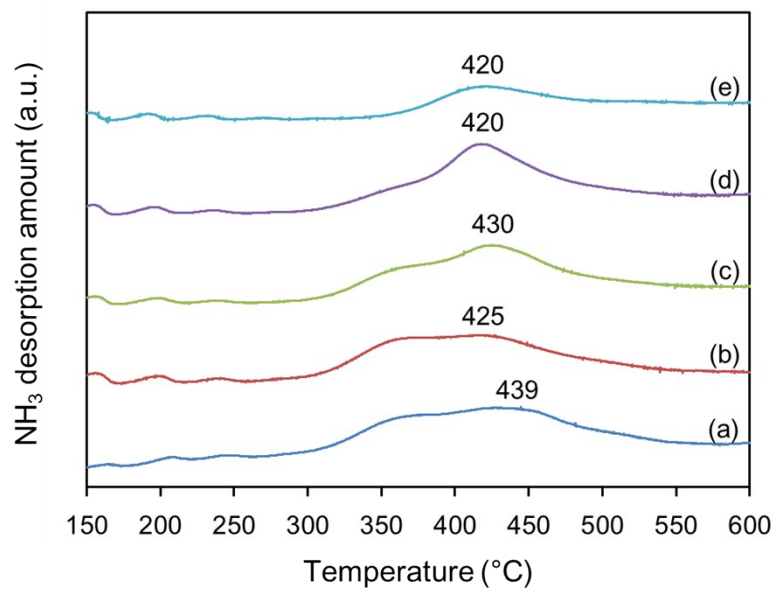

Fig. S4. NH<sub>3</sub>-TPR profiles of Zn-Al composite oxides: (a) S-120, (b) S-140, (c) S-160, (d) S-180, and (e) S-200.

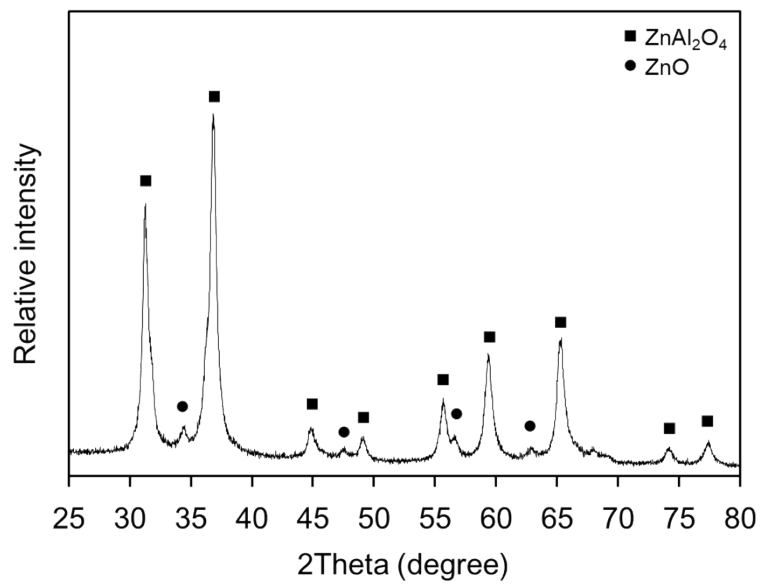

Fig. S5. XRD pattern of ZnAl<sub>2</sub>O<sub>4</sub> support.

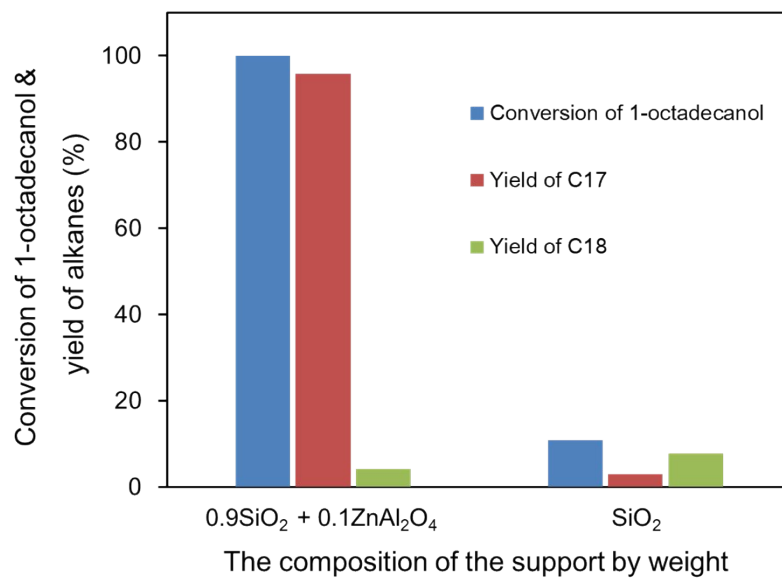

Fig. S6. The effect of addition amount of ZnAl<sub>2</sub>O<sub>4</sub> on the catalytic deoxygenation of 1-octadecanol. Reaction conditions: 1-octadecanol (2.0 g), decalin (30.0 g), catalyst (0.2 g), temperature (280 °C), H<sub>2</sub> pressure (2.5 MPa), and stirring at 600 r/min for 6 h.

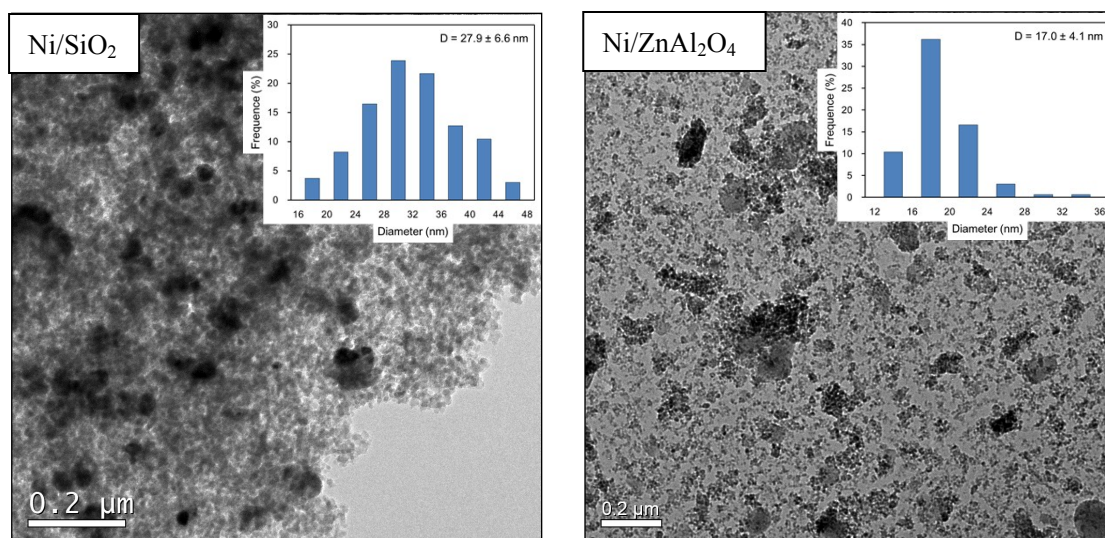

Fig. S7. TEM images of the reduced Ni-based catalysts and their histograms of Ni particle size distribution (inset).

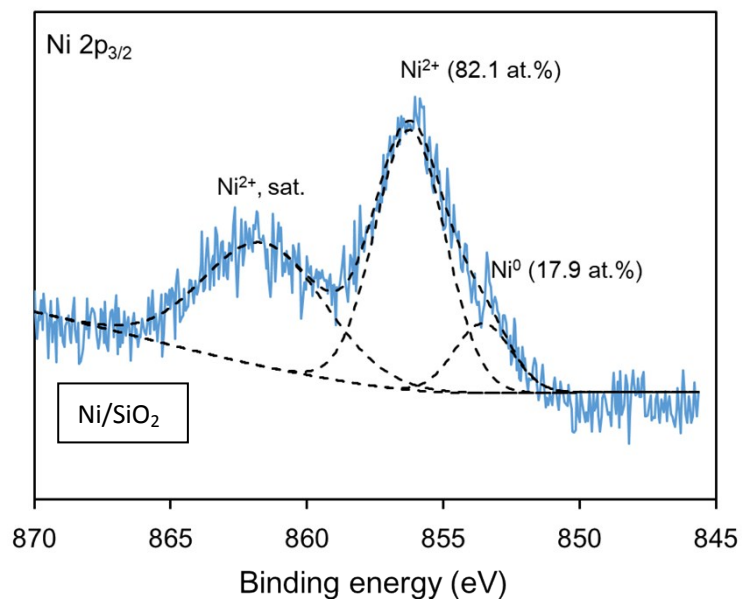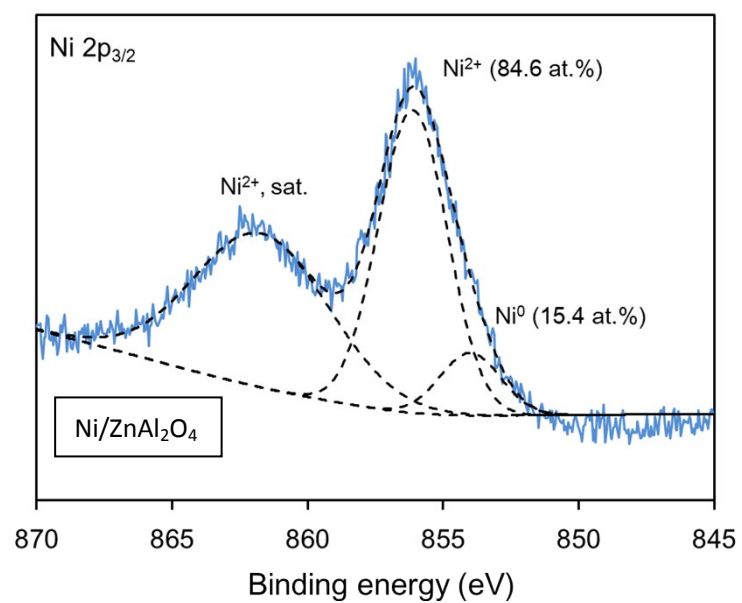

Fig. S8. Ni  $2p_{3/2}$  XPS spectra of Ni/SiO<sub>2</sub> and Ni/ZnAl<sub>2</sub>O<sub>4</sub> catalysts.
